# Supplementary material for: A Full-Scale Comparative Study of Conventional and Side-Stream Enhanced Biological Phosphorus Removal Processes
Source: Preprints.org preprint supplement (doi:10.20944/preprints201808.0250.v1), 2018-08-14
Supplement: Supplementary file 1 [file supplementary]

## Supplementary information for:

### A Full-Scale Comparative Study of Conventional and Side-Stream Enhanced Biological Phosphorus Removal Processes

Dongqi Wang<sup>1,2</sup>, Nicholas B. Tooker<sup>2</sup>, Varun Srinivasan<sup>2</sup>, Guangyu Li<sup>2</sup>, Peter Schauer<sup>3</sup>, Adrienne Menniti<sup>3</sup>, Chris Maher<sup>3</sup>, Charles B. Bott<sup>4</sup>, Paul Dombrowski<sup>5</sup>, James L. Barnard<sup>6</sup>, Annalisa Onnis-Hayden<sup>2</sup> and April Z. Gu<sup>2,7,\*</sup>

<sup>1</sup> State Key Laboratory of Eco-hydraulics in Northwest Arid Region, Xi'an University of Technology, Xi'an, Shaanxi 710048, China

<sup>2</sup> Department of Civil and Environmental Engineering, Northeastern University, 360 Huntington Avenue, Boston, MA 02115, United States

<sup>3</sup> Clean Water Services, 16060 SW 85th Avenue, Tigard, OR 97224, United States

<sup>4</sup> Hampton Roads Sanitation District, 1434 Air Rail Avenue, Virginia Beach, VA 23454, United States

<sup>5</sup> Woodard & Curran, Inc., 1699 King Street, Enfield, CT 06082, United States

<sup>6</sup> Black & Veatch, 8400 Ward Parkway, Kansas City, MO 64114, United States

<sup>7</sup> School of Civil and Environmental Engineering, Cornell University, 220 Hollister Hall, Ithaca, NY 14853, United States

## Contents

### 1. Tables

**Table S1** Key process parameters for the typical secondary biological treatment train.

**Table S2** Sampling plan during full-scale pilot testing at the Rock Creek Facility.

**Table S3** Probes for FISH analysis for quantification of functionally relevant microbial populations.

**Table S4** Summary of PO<sub>4</sub>-P performance data during the pilot test.

**Table S5** Error! No text of specified style in document. Summary of PO<sub>4</sub>-P release and uptake profiles during full-scale pilot testing (Phase I, A2O and SSRC configurations), units in mg P/L.

**Table S6** Influent COD/P and VFA/P ratios in A2O and S2EBPR configurations during pilot testing.

**Table S7** Distribution and load of VFA and PO<sub>4</sub>-P in the aerobic zone of A2O and S2EBPR configurations during Phase I-B.

**Table S8** Average retention time in A2O and S2EBPR configurations during pilot testing at the Rock Creek Facility.

### 2. Figures

---

\* Corresponding author.

E-mail address: aprilgu@cornell.edu (A. Z. Gu)

**Figure S1** Normalized PO<sub>4</sub>-P concentration profiles during full-scale pilot testing in (a) Phase I-A and (b) Phase I-B. Error bars indicate standard errors.

**Figure S2** Normalized PO<sub>4</sub>-P release and uptake concentration profiles during full-scale pilot testing in (a) Phase I-A and (b) Phase I-B. Error bars indicate standard errors; SC: secondary clarifier.

**Figure S3** Profiles of PO<sub>4</sub>-P, NO<sub>x</sub>-N, VFA, glycogen, and PHA during P release and uptake batch tests on 8/3/2016 (Phase I-B, A2O and SSRC configurations).

**Figure S4** VFA loads from PE and UFAT during pilot testing at the Rock Creek Facility (Phase I, A2O and SSRC configurations).

**Figure S5** VFA composition in (a) PE and (b) UFAT during pilot testing at the Rock Creek Facility (Phase I, A2O and SSRC configurations).

**Figure S6** Time series heatmap of the core OTUs (n=57) found in both A2O and S2EBPR configurations during pilot testing.

**Table S1** Key process parameters for the typical secondary biological treatment train.

| Zone      | Cell   | Size (L×W×D)<br>(ft) | Volume<br>(gal) | HRT<br>(h) | SRT<br>(days) |
|-----------|--------|----------------------|-----------------|------------|---------------|
| Anaerobic | Cell 1 | 27×27×15             | 81,194          | 0.7        | 0.7 h         |
|           | Cell 2 | 27×27×15             | 82,726          |            |               |
| Anoxic    | Cell 3 | 27×27×15             | 81,946          | 0.7        | 0.7 h         |
|           | Cell 4 | 27×27×15             | 81,946          |            |               |
| Aerobic   | Cell 5 | 218×55×15            | 1,357,523       | 6.1        | 4.5           |
| Total     | -      | -                    | 1,685,335       | 7.5        | 5.4           |

**Table S2** Sampling plan during full-scale pilot testing at the Rock Creek Facility.

| Parameter<br>/Test                     | Minimum frequency<br>/Sampling Date | Sampling site                |
|----------------------------------------|-------------------------------------|------------------------------|
| Flow                                   | Daily                               | PE, UFAT, AB, WAS, RAS, CELL |
| pH                                     | Daily                               | PE, SE, AB                   |
| COD                                    | Daily                               | PE, SE                       |
| sCOD                                   | 1/week                              | SE                           |
| Alkalinity                             | 4/week                              | PE, SE, RAS                  |
| TSS                                    | 3/week                              | PE, SE, AB, CELL             |
| VSS                                    | 1/week                              | PE, SE, AB                   |
| SVI                                    | 4/week                              | AB                           |
| TP                                     | 1/week                              | PE, SE                       |
| PO <sub>4</sub> -P                     | Daily                               | PE, SE, CELL                 |
| TKN                                    | 1/week                              | PE                           |
| NH <sub>4</sub> -N                     | Daily                               | PE, SE                       |
| NO <sub>3</sub> -N, NO <sub>2</sub> -N | 1/week                              | PE, SE, CELL                 |
| SRT                                    | 3/week                              | AB                           |
| ORP                                    | 1/week                              | CELL                         |
| VFAs                                   | 3/week                              | PE, UFAT                     |
| P release-uptake testing               | a                                   | AB                           |
| FISH, DAPI                             | b                                   | AB                           |
| Glycogen                               | c                                   | AB                           |
| PHAs                                   | c                                   | AB                           |
| Amplicon sequencing                    | d                                   | AB                           |

PE: primary effluent; SE: secondary effluent; UFAT: unified fermentation and thickening process; AB: aeration basins (AB4 and AB5); WAS: wasted activated sludge; RAS: return activated sludge; CELL: Cell 1, 2, 3, 4, mid and end of Cell 5 in each train;

a: May 18, May 25, June 8, June 15, June 22, June 29, July 6, July 13, July 21, and August 3;

b: April 26, June 22, July 7, July 20, August 2, August 30, and October 26;

c: June 21 and August 3;

d: April 7, April 26, June 22, July 20, August 2, August 17, August 30, and October 26.

**Table S3** Probes for FISH analysis for quantification of functionally relevant microbial populations.

|               | Probe      | Sequence                 | Specificity                                  | Formamide % | References              |
|---------------|------------|--------------------------|----------------------------------------------|-------------|-------------------------|
| Most Bacteria | EUB338     | GCTGCCTCCCGTAGGAGT       | Most bacteria                                | 35          | (Bonkowski, 2004)       |
|               | EUB338 II  | GCAGCCACCCGTAGGTGT       | <i>Verrucomicrobiales</i> and other bacteria | 35          | (Daims et al., 1999)    |
|               | EUB338 III | GCTGCCACCCGTAGGTGT       | <i>Planctomycetales</i> and other bacteria   | 35          | (Daims et al., 1999)    |
| PAO           | PAO462b    | CCGTCATCTRCWCAGGGTATTAAC | Most Accumulibacter                          | 35          | (Zilles et al., 2002)   |
|               | PAO651     | CCCTCTGCCAAACTCCAG       | Most Accumulibacter                          | 35          | (Crocetti et al., 2000) |
|               | PAO846b    | GTTAGCTACGGYACTAAAAGG    | Most Accumulibacter                          | 35          | (Zilles et al., 2002)   |
|               | Tet1-266   | CCCGTCGTCGCCTGTAGC       | <i>Tetrasphaera</i> clade 1                  | 25          | (Nguyen et al., 2011a)  |
|               | Tet2-892   | TAGTTAGCCTTGCGGCCG       | <i>Tetrasphaera</i> clade 2A                 | 5           | (Nguyen et al., 2011a)  |
|               | Tet2-174   | GCTCCGTCTCGTATCCGG       | <i>Tetrasphaera</i> clade 2B                 | 20          | (Nguyen et al., 2011a)  |
|               | Tet3-654   | GGTCTCCCCTACCATACT       | <i>Tetrasphaera</i> clade 3                  | 35          | (Nguyen et al., 2011a)  |
| GAO           | GAOQ431    | TCCCCGCCTAAAGGGCTT       | Some Competibacter                           | 35          | (Crocetti et al., 2002) |
|               | GAOQ989    | TTCCCCGGATGTCAAGGC       | Some Competibacter                           | 35          | (Crocetti et al., 2002) |
|               | GB742      | CTCAGCGTCAGTGTGGCC       | Most Competibacter                           | 35          | (Kim et al., 2010)      |
|               | TFO_DF218  | GAAGCCTTTGCCCCCTCAG      | <i>Defluvicoccus</i> Cluster 1               | 35          | (Wong et al., 2004)     |
|               | TFO_DF618  | GCCTCACTTGTCTAACCG       | <i>Defluvicoccus</i> Cluster 1               | 35          | (Wong et al., 2004)     |
|               | DF988      | GATACGACGCCCATGTCAAGGG   | <i>Defluvicoccus</i> Cluster 2               | 35          | (Meyer et al., 2006)    |
|               | DF1020     | CCGGCCGAACCGACTCCC       | <i>Defluvicoccus</i> Cluster 2               | 35          | (Meyer et al., 2006)    |

**Table S4** Summary of PO<sub>4</sub>-P performance data during the pilot test.

|                               | Phase I-A |        |        | Phase I-B |        |        |
|-------------------------------|-----------|--------|--------|-----------|--------|--------|
|                               | PE        | AB4 SE | AB5 SE | PE        | AB4 SE | AB5 SE |
| Mean (mg/L)                   | 1.73      | 0.67   | 0.59   | 2.07      | 0.40   | 0.10   |
| Geometric Mean (mg/L)         | 1.62      | 0.28   | 0.19   | 2.02      | 0.27   | 0.09   |
| Std. Dev (mg/L)               | 0.72      | 1.02   | 0.99   | 0.48      | 0.32   | 0.08   |
| Skew                          | 1.72      | 2.29   | 2.43   | 1.45      | 0.95   | 2.08   |
| Minimum (mg/L)                | 0.79      | 0.04   | 0.03   | 1.25      | 0.04   | 0.03   |
| Maximum (mg/L)                | 4.44      | 4.20   | 4.28   | 4.07      | 1.50   | 0.41   |
| 3.84% [mg/L]                  | 0.98      | 0.04   | 0.03   | 1.39      | 0.06   | 0.04   |
| 50% [mg/L]                    | 1.49      | 0.24   | 0.17   | 1.98      | 0.36   | 0.07   |
| 90% [mg/L]                    | 2.50      | 2.05   | 1.60   | 2.58      | 0.78   | 0.24   |
| 3.84%/50%                     | 0.65      | 0.16   | 0.18   | 0.71      | 0.16   | 0.52   |
| 90%/50%                       | 1.68      | 8.40   | 9.18   | 1.30      | 2.15   | 3.20   |
| PO <sub>4</sub> -P < 0.1 mg/L | 0%        | 25%    | 45%    | 0%        | 23%    | 71%    |
| PO <sub>4</sub> -P < 0.5 mg/L | 0%        | 71%    | 71%    | 0%        | 64%    | 100%   |
| PO <sub>4</sub> -P < 1.0 mg/L | 7%        | 78%    | 80%    | 0%        | 93%    | 100%   |
| PO <sub>4</sub> -P < 1.5 mg/L | 51%       | 87%    | 89%    | 7%        | 99%    | 100%   |
| PO <sub>4</sub> -P < 2.0 mg/L | 78%       | 89%    | 91%    | 51%       | 100%   | 100%   |

**Table S**Error! No text of specified style in document. Summary of PO<sub>4</sub>-P release and uptake profiles during full-scale pilot testing (Phase I, A2O and SSRC configurations), units in mg P/L.

| Configuration (Phase) | Influent <sup>a</sup> | Effluent | P release | P uptake | Net P removal | Removal efficiency |
|-----------------------|-----------------------|----------|-----------|----------|---------------|--------------------|
| Phase I-A             |                       |          |           |          |               |                    |
| AB4                   | 4.4                   | 1.0      | 3.3       | 6.7      | 3.4           | 77%                |
| AB5                   | 4.4                   | 1.0      | 3.0       | 6.4      | 3.4           | 77%                |
| Phase I-B             |                       |          |           |          |               |                    |
| AB4                   | 3.9                   | 0.4      | 5.9       | 9.4      | 3.5           | 89%                |
| AB5                   | 3.9                   | 0.1      | 6.2       | 10.0     | 3.8           | 97%                |

<sup>a</sup>: includes PO<sub>4</sub>-P contained in PE, UFAT, and RAS.

**Table S6** Influent COD/P and VFA/P ratios in A2O and S2EBPR configuration during pilot testing.

| Source | COD/TP | COD/PO <sub>4</sub> -P | VFA/TP  | VFA/PO <sub>4</sub> -P | HAc/HPr |
|--------|--------|------------------------|---------|------------------------|---------|
| PE     | 72±9   | 80±22                  | 4.6±3.7 | 5.3±3.9                | 2.6±2.1 |

|      |    |    |    |         |         |
|------|----|----|----|---------|---------|
| UFAT | NA | NA | NA | 208±180 | 1.3±0.4 |
|------|----|----|----|---------|---------|

Units: g COD/g P; values shown are mean± standard deviation. HAc: acetate; HPr: propionate; NA: not available.

**Table S7** Distribution and load of VFA and PO<sub>4</sub>-P in the aerobic zone of A2O and S2EBPR configurations during Phase I-B.

| Location        | VFA (kgCOD/d) |      |     |       | PO <sub>4</sub> -P (kgP/d) |      |     |       | VFA/PO <sub>4</sub> -P<br>(g COD/g P) |
|-----------------|---------------|------|-----|-------|----------------------------|------|-----|-------|---------------------------------------|
|                 | PE            | UFAT | SSR | Total | PE                         | UFAT | SSR | Total |                                       |
| AB4 (AN)        | 429           | 403  | NA  | 832   | 85                         | 1    | NA  | 86    | 9.7                                   |
| AB5<br>(SSR+MS) | 428           | 403  | 180 | 1011  | 84                         | 1    | NA  | 85    | 11.9                                  |

AN: anaerobic zone; SSR: estimated VFA production in side-stream reactor; MS: mainstream; NA: not available.

**Table S8** Average retention time in A2O and S2EBPR configurations during pilot testing at the Rock Creek Facility.

| Configuration | Anaerobic HRT (h) |     | Anaerobic SRT (h) |     | Aerobic SRT (d) |     |
|---------------|-------------------|-----|-------------------|-----|-----------------|-----|
|               | I-A               | I-B | I-A               | I-B | I-A             | I-B |
| AB4           | 0.6               | 0.8 | 0.6               | 0.8 | 4.6             | 4.5 |
| AB5           | 1.6               | 2.1 | 1.6               | NA  | 4.8             | 4.5 |

NA: not available.

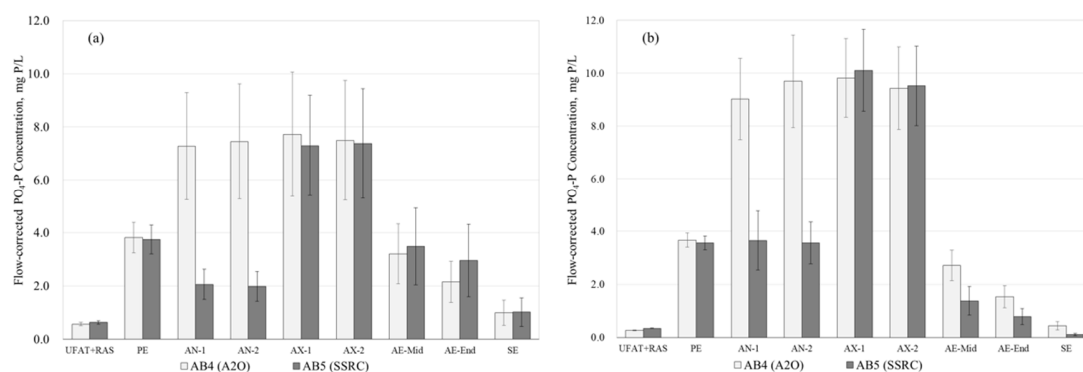

**Figure S1** Normalized PO<sub>4</sub>-P concentration profiles during full-scale pilot testing in (a) Phase I-A and (b) Phase I-B. Error bars indicate standard errors.

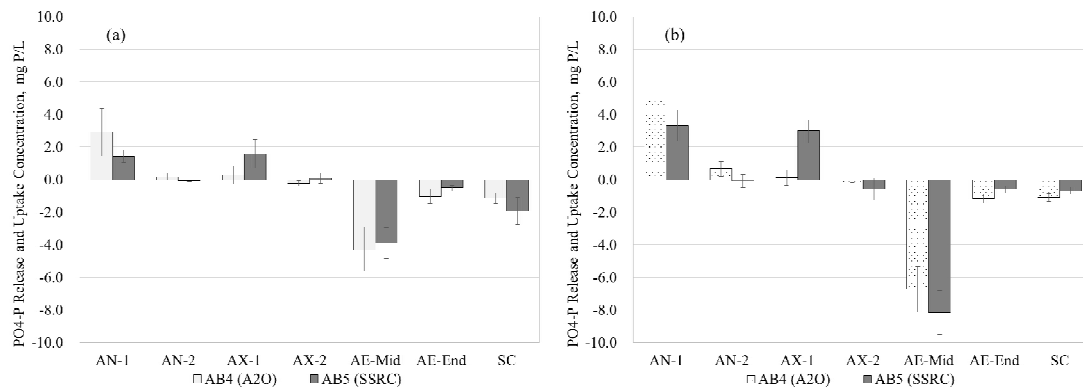

**Figure S2** Normalized  $\text{PO}_4\text{-P}$  release and uptake concentration profiles during full-scale pilot testing in (a) Phase I-A and (b) Phase I-B. Error bars indicate standard errors; SC: secondary clarifier.

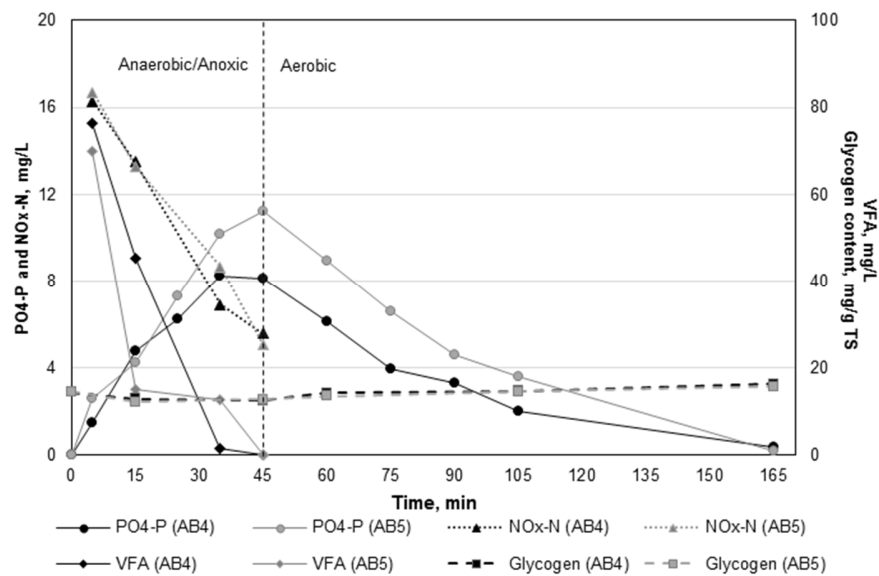

**Figure S3** Profiles of  $\text{PO}_4\text{-P}$ ,  $\text{NO}_x\text{-N}$ , VFA, glycogen, and PHA during P release and uptake batch tests on 8/3/2016 (Phase I-B, A2O and SSRC configurations).

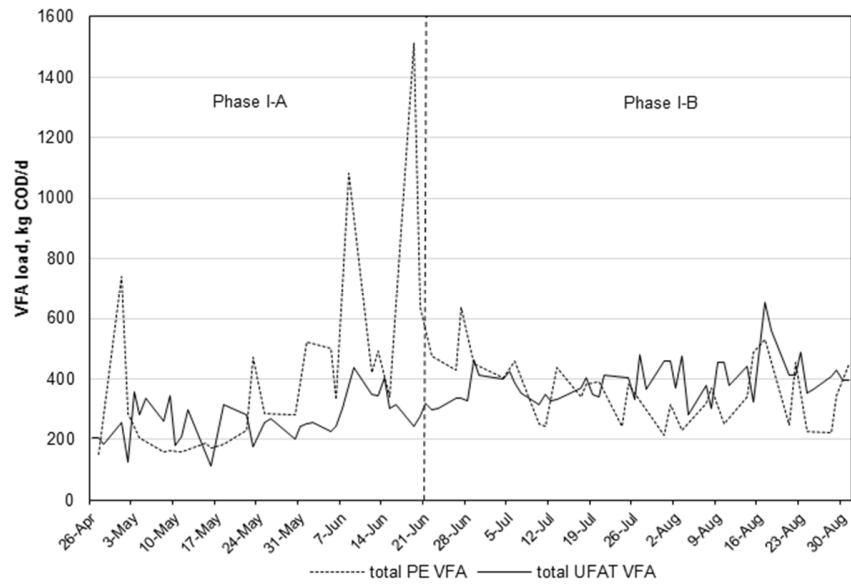

**Figure S4** VFA loads from PE and UFAT during pilot testing at the Rock Creek Facility (Phase I, A2O and SSRC configurations).

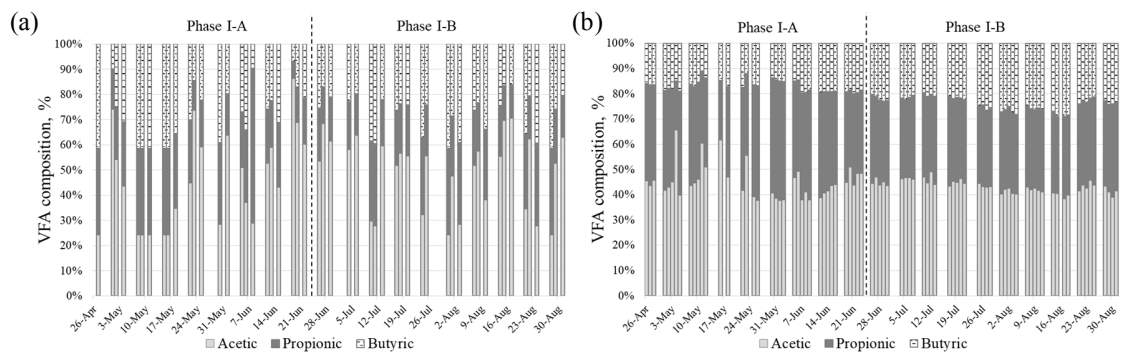

**Figure S5** VFA composition in (a) PE and (b) UFAT during pilot testing at the Rock Creek Facility (Phase I, A2O and SSRC configurations).

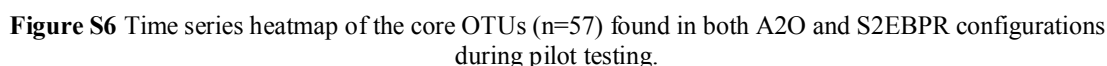

**Figure S6** Time series heatmap of the core OTUs (n=57) found in both A2O and S2EBPR configurations during pilot testing.
